# Supplementary material for: Comprehensive multi-omics analysis reveals the core role of glycerophospholipid metabolism in rheumatoid arthritis development
Source: PubMed Central journal article supplement (PMC10722724; doi:10.1186/s13075-023-03208-2), 2023-12-15
Supplement: 13075_2023_3208_MOESM10_ESM.pdf [file 13075_2023_3208_MOESM10_ESM.pdf]

**Supplementary Table 1.** Clinical characteristics of the subjects were included in our study.

| Characteristics | Discovery cohort |               | P      | Control (n=75) | Validation cohort |               | P      |
|-----------------|------------------|---------------|--------|----------------|-------------------|---------------|--------|
|                 | NORA (n=34)      | CRA (n=53)    |        |                | NORA (n=8)        | CRA (n=18)    |        |
| Age (year)      | 56.74±12.98      | 57.94±10.55   | 0.635  | 51.61±7.72     | 61.25±8.48        | 58.28±8.27    | 0.410  |
| Female,sex (n)  | 20               | 41            | 0.065  | 31             | 5                 | 10            | 1.000  |
| CRP (mg/L)      | 37.12±39.16      | 36.49±32.85   | 0.548  | —              | 47.91±55.31       | 59.98±48.72   | 0.291  |
| ESR (mm/h)      | 56.73±35.08      | 63.08±30.02   | 0.376  | —              | 67.63±37.36       | 74.39±31.73   | 0.639  |
| RF (U/ml)       | 269.51±217.67    | 277.74±403.03 | 0.401  | —              | 231.81±453.51     | 359.60±230.48 | 0.046* |
| SJC28           | 10.10±7.41       | 6.33±6.92     | 0.014* | —              | 15.50±9.70        | 8.61±10.04    | 0.083  |
| TJC28           | 11.65±7.75       | 9.72±8.19     | 0.218  | —              | 16.00±11.05       | 10.39±10.99   | 0.261  |
| DAS28(3)        | 5.56±1.39        | 5.35±1.23     | 0.358  | —              | 5.79±1.69         | 4.99±2.10     | 0.350  |
| IL-6 (pg/mL)    | 84.42±80.31      | 65.42±125.90  | 0.032* | —              | —                 | —             | —      |

Date presented as number mean±standard deviation.

NORA, new-onset rheumatoid arthritis; CRA, chronic rheumatoid arthritis; CRP, C-reactive protein; ESR, erythrocyte sedimentation rate; RF, rheumatoid factors; SJC28, 28 swollen joints count; TJC28, 28 tender joints count; DAS28, disease activity score; DAS28(3) =  $[0.56*\sqrt{t28} + 0.28*\sqrt{sw28} + 0.70*\ln(\text{ESR})]*1.08 + 0.16$ ; IL-6, Interleukin 6; \*,  $P \leq 0.05$ .

**Supplementary Table 2.** Enrichment pathway of 6 differentially significant metabolites between NORA and CRA patients.

| Metabolite                                       | VIP    | FC     | P value   |
|--------------------------------------------------|--------|--------|-----------|
| L-Phenylalanine                                  | 2.0842 | 1.1692 | 0.0305*   |
| Trans-cinnamate                                  | 1.5284 | 1.3520 | 0.0183*   |
| Alpha-N-Phenylacetyl-L-glutamine                 | 1.6636 | 1.4605 | 0.0330*   |
| 1-Palmitoyl-sn-glycero-3-phosphocholine          | 1.8082 | 0.6142 | 0.0071**  |
| 1-Stearoyl-2-hydroxy-sn-glycero-3-phosphocholine | 3.0471 | 0.6216 | 0.0002*** |
| Glycerophosphocholine                            | 1.9527 | 0.714  | 0.0042**  |

NORA, new-onset rheumatoid arthritis; CRA, chronic rheumatoid arthritis. \*,  $P < 0.05$ ;

\*\* ,  $P \leq 0.01$ , \*\*\* ,  $P \leq 0.001$ .

**Supplementary Table 3.** 9 gene sets were significantly enriched in the control, based on all protein-coding genes by GSEA analysis between NORA and control.

| NAME                                                      | SIZE | ES    | NES   | P value |
|-----------------------------------------------------------|------|-------|-------|---------|
| KEGG_NEUROACTIVE_LIGAND_RECEPTOR_INTERACTION              | 216  | -0.35 | -1.59 | 0.000   |
| KEGG_TASTE_TRANSDUCTION                                   | 42   | -0.53 | -1.83 | 0.002   |
| KEGG_GLYCOSYLPHOSPHATIDYLINOSITOL_GPI_ANCHOR_BIOSYNTHESIS | 24   | -0.50 | -1.66 | 0.008   |
| KEGG_ARACHIDONIC_ACID_METABOLISM                          | 48   | -0.42 | -1.58 | 0.016   |
| KEGG_GLYCEROPHOSPHOLIPID_METABOLISM                       | 73   | -0.37 | -1.54 | 0.020   |
| KEGG_HEDGEHOG_SIGNALING_PATHWAY                           | 53   | -0.36 | -1.43 | 0.032   |
| KEGG_BASAL_CELL_CARCINOMA                                 | 54   | -0.41 | -1.54 | 0.032   |
| KEGG_CALCIIUM_SIGNALING_PATHWAY                           | 162  | -0.29 | -1.36 | 0.035   |
| KEGG_RNA_POLYMERASE                                       | 28   | -0.45 | -1.47 | 0.048   |

NORA, new-onset rheumatoid arthritis; CRA, chronic rheumatoid arthritis; GSEA, Gene Set Enrichment Analysis.

**Supplementary Table 4.** Significant enrichment of 3 gene sets in control, 16 gene sets in CRA, based on all protein-coding genes between CRA and controls by GSEA analysis.

| 3 gene sets enriched in control                           |      |       |       |         |
|-----------------------------------------------------------|------|-------|-------|---------|
| NAME                                                      | SIZE | ES    | NES   | P-value |
| KEGG_TASTE_TRANSDUCTION                                   | 42   | -0.57 | -1.74 | 0.012   |
| KEGG_LINOLEIC_ACID_METABOLISM                             | 25   | -0.57 | -1.62 | 0.002   |
| KEGG_ARRHYTHMOGENIC_RIGHT_VENTRICULAR_CARDIOMYOPATHY_ARVC | 73   | -0.33 | -1.40 | 0.038   |
| 16 gene sets enriched in CRA                              |      |       |       |         |
| NAME                                                      | SIZE | ES    | NES   | P value |
| KEGG_CYSTEINE_AND_METHIONINE_METABOLISM                   | 33   | 0.52  | 1.83  | 0.002   |
| KEGG_PARKINSONS_DISEASE                                   | 121  | 0.62  | 1.81  | 0.034   |
| KEGG_OXIDATIVE_PHOSPHORYLATION                            | 126  | 0.61  | 1.80  | 0.036   |
| KEGG_HUNTINGTONS_DISEASE                                  | 173  | 0.49  | 1.75  | 0.038   |
| KEGG_LYSOSOME                                             | 118  | 0.52  | 1.74  | 0.006   |
| KEGG_ALZHEIMERS_DISEASE                                   | 158  | 0.48  | 1.73  | 0.045   |
| KEGG_GLUTATHIONE_METABOLISM                               | 43   | 0.52  | 1.73  | 0.002   |
| KEGG_CITRATE_CYCLE_TCA_CYCLE                              | 28   | 0.62  | 1.73  | 0.016   |
| KEGG_PROTEASOME                                           | 44   | 0.52  | 1.71  | 0.028   |
| KEGG_ANTIGEN_PROCESSING_AND_PRESENTATION                  | 69   | 0.48  | 1.67  | 0.010   |
| KEGG_PROTEIN_EXPORT                                       | 23   | 0.59  | 1.67  | 0.029   |
| KEGG_PATHOGENIC_ESCHERICHIA_COLI_INFECTION                | 54   | 0.52  | 1.65  | 0.021   |
| KEGG_OOCYTE_MEIOSIS                                       | 107  | 0.38  | 1.59  | 0.014   |
| KEGG_BIOSYNTHESIS_OF_UNSATURATED_FATTY_ACIDS              | 22   | 0.52  | 1.58  | 0.022   |
| KEGG_PENTOSE_PHOSPHATE_PATHWAY                            | 25   | 0.52  | 1.56  | 0.042   |
| KEGG_SNARE_INTERACTIONS_IN_VESICULAR_TRANSPORT            | 38   | 0.42  | 1.52  | 0.047   |

**Supplementary Table 5.** KEGG and GO enrichment analysis of 196 differentially expressed genes between NORA and control.

| ID         | Pathway_Name                                           | Count | Enrichment  | p_Value     |
|------------|--------------------------------------------------------|-------|-------------|-------------|
| hsa04913   | Ovarian steroidogenesis                                | 3     | 0.0625      | 0.006492759 |
| hsa04610   | Complement and coagulation cascades                    | 3     | 0.04        | 0.021789907 |
| hsa04970   | Salivary secretion                                     | 3     | 0.035294118 | 0.030145967 |
| GO:0019373 | epoxygenase P450 pathway                               | 3     | 0.142857143 | 0.000771184 |
| GO:0034754 | cellular hormone metabolic process                     | 5     | 0.043478261 | 0.003362224 |
| GO:0046426 | negative regulation of JAK-STAT cascade                | 3     | 0.058823529 | 0.009980307 |
| GO:1904893 | negative regulation of STAT cascade                    | 3     | 0.058823529 | 0.009980307 |
| GO:0019369 | arachidonic acid metabolic process                     | 3     | 0.056603774 | 0.011086064 |
| GO:0050803 | regulation of synapse structure or activity            | 5     | 0.028409091 | 0.01913541  |
| GO:0019748 | secondary metabolic process                            | 3     | 0.044776119 | 0.020760376 |
| GO:0006805 | xenobiotic metabolic process                           | 4     | 0.033333333 | 0.020971551 |
| GO:0010951 | negative regulation of endopeptidase activity          | 6     | 0.024       | 0.022504345 |
| GO:0010466 | negative regulation of peptidase activity              | 6     | 0.022813688 | 0.027947001 |
| GO:0050906 | detection of stimulus involved in sensory perception   | 9     | 0.018255578 | 0.029030265 |
| GO:0010765 | positive regulation of sodium ion transport            | 2     | 0.064516129 | 0.029796211 |
| GO:0006730 | one-carbon metabolic process                           | 2     | 0.057142857 | 0.03727676  |
| GO:0044344 | cellular response to fibroblast growth factor stimulus | 4     | 0.027777778 | 0.037446944 |
| GO:0043271 | negative regulation of ion transport                   | 4     | 0.027586207 | 0.038257559 |
| GO:0043267 | negative regulation of potassium ion transport         | 2     | 0.055555556 | 0.039248174 |
| GO:0071774 | response to fibroblast growth factor                   | 4     | 0.026490066 | 0.043332106 |
| GO:0051588 | regulation of neurotransmitter transport               | 3     | 0.033333333 | 0.04410979  |
| GO:0051346 | negative regulation of hydrolase activity              | 8     | 0.017621145 | 0.045733779 |
| GO:0016125 | sterol metabolic process                               | 4     | 0.025974026 | 0.046004936 |
| GO:0072503 | cellular divalent inorganic cation homeostasis         | 8     | 0.01754386  | 0.046713745 |
| GO:0042181 | ketone biosynthetic process                            | 2     | 0.05        | 0.047514063 |

**Supplementary Table 6.** KEGG and GO enrichment analysis of 211 differentially expressed genes between CRA and control.

| ID         | Pathway_Name                                         | Count | Enrichment  | p_Value     |
|------------|------------------------------------------------------|-------|-------------|-------------|
| hsa00982   | Drug metabolism - cytochrome P450                    | 6     | 0.092307692 | 8.04E-05    |
| hsa04020   | Calcium signaling pathway                            | 8     | 0.043715847 | 0.000966098 |
| hsa00980   | Metabolism of xenobiotics by cytochrome P450         | 5     | 0.072463768 | 0.0010045   |
| hsa05204   | Chemical carcinogenesis                              | 5     | 0.064935065 | 0.001646987 |
| hsa04726   | Serotonergic synapse                                 | 5     | 0.044642857 | 0.008252113 |
| hsa05322   | Systemic lupus erythematosus                         | 5     | 0.043103448 | 0.009530419 |
| hsa04610   | Complement and coagulation cascades                  | 4     | 0.053333333 | 0.009773631 |
| hsa00360   | Phenylalanine metabolism                             | 2     | 0.125       | 0.013470534 |
| hsa04970   | Salivary secretion                                   | 4     | 0.047058824 | 0.014971476 |
| hsa04974   | Protein digestion and absorption                     | 4     | 0.046511628 | 0.01557085  |
| hsa00140   | Steroid hormone biosynthesis                         | 3     | 0.055555556 | 0.022383946 |
| hsa04750   | Inflammatory mediator regulation of TRP channels     | 4     | 0.040816327 | 0.02395963  |
| hsa00340   | Histidine metabolism                                 | 2     | 0.090909091 | 0.024831356 |
| hsa04921   | Oxytocin signaling pathway                           | 5     | 0.032894737 | 0.027571626 |
| hsa04080   | Neuroactive ligand-receptor interaction              | 7     | 0.025547445 | 0.033446169 |
| hsa00830   | Retinol metabolism                                   | 3     | 0.046875    | 0.034734996 |
| hsa04919   | Thyroid hormone signaling pathway                    | 4     | 0.035714286 | 0.036665856 |
| hsa04742   | Taste transduction                                   | 3     | 0.044776119 | 0.039003143 |
| hsa05031   | Amphetamine addiction                                | 3     | 0.044776119 | 0.039003143 |
| hsa05214   | Glioma                                               | 3     | 0.042857143 | 0.043526369 |
| hsa00983   | Drug metabolism - other enzymes                      | 3     | 0.04109589  | 0.048300933 |
| hsa05133   | Pertussis                                            | 3     | 0.04109589  | 0.048300933 |
| hsa04971   | Gastric acid secretion                               | 3     | 0.040540541 | 0.049947573 |
| GO:0043271 | negative regulation of ion transport                 | 7     | 0.048275862 | 0.00050106  |
| GO:1900371 | regulation of purine nucleotide biosynthetic process | 7     | 0.045454545 | 0.00071715  |
| GO:0030808 | regulation of nucleotide biosynthetic process        | 7     | 0.04516129  | 0.000745113 |
| GO:0019373 | epoxygenase P450 pathway                             | 3     | 0.142857143 | 0.001014523 |
| GO:0014065 | phosphatidylinositol 3-kinase signaling              | 6     | 0.045801527 | 0.001655385 |
| GO:0019369 | arachidonic acid metabolic process                   | 4     | 0.075471698 | 0.001656886 |
| GO:0048015 | phosphatidylinositol-mediated signaling              | 6     | 0.037735849 | 0.004342374 |
| GO:2001257 | regulation of cation channel activity                | 6     | 0.0375      | 0.004476564 |
| GO:2000257 | regulation of protein activation cascade             | 3     | 0.06122449  | 0.01155576  |
| GO:0002544 | chronic inflammatory response                        | 2     | 0.105263158 | 0.014044865 |
| GO:0052652 | cyclic purine nucleotide metabolic process           | 4     | 0.038461538 | 0.01787916  |
| GO:0008654 | phospholipid biosynthetic process                    | 7     | 0.024221453 | 0.021614065 |
| GO:0046474 | glycerophospholipid biosynthetic process             | 6     | 0.024489796 | 0.030932198 |

|            |                                                                           |   |             |             |
|------------|---------------------------------------------------------------------------|---|-------------|-------------|
| GO:0006171 | cAMP biosynthetic process                                                 | 3 | 0.041666667 | 0.031913732 |
| GO:0030818 | negative regulation of cAMP biosynthetic process                          | 2 | 0.066666667 | 0.033361672 |
| GO:0038111 | interleukin-7-mediated signaling pathway                                  | 2 | 0.066666667 | 0.033361672 |
| GO:0098761 | cellular response to interleukin-7                                        | 2 | 0.064516129 | 0.035442037 |
| GO:0071875 | adrenergic receptor signaling pathway                                     | 2 | 0.0625      | 0.037571344 |
| GO:0006644 | phospholipid metabolic process                                            | 9 | 0.019067797 | 0.038471875 |
| GO:0030814 | regulation of cAMP metabolic process                                      | 3 | 0.037974684 | 0.040333433 |
| GO:0050848 | regulation of calcium-mediated signaling                                  | 3 | 0.037974684 | 0.040333433 |
| GO:0007188 | adenylate cyclase-modulating G-protein coupled receptor signaling pathway | 5 | 0.025       | 0.043730329 |
| GO:0009132 | nucleoside diphosphate metabolic process                                  | 4 | 0.027777778 | 0.049994036 |
| GO:0044344 | cellular response to fibroblast growth factor stimulus                    | 4 | 0.027777778 | 0.049994036 |

**Supplementary Table 7.** KEGG and GO enrichment analysis of 40 differentially expressed genes between NORA and CRA patients.

| ID         | Pathway_Name                                        | Count | Enrichment  | p_Value     |
|------------|-----------------------------------------------------|-------|-------------|-------------|
| hsa00564   | Glycerophospholipid metabolism                      | 2     | 0.020833333 | 0.007523158 |
| hsa00604   | Glycosphingolipid biosynthesis - ganglio series     | 1     | 0.071428571 | 0.01947223  |
| hsa04964   | Proximal tubule bicarbonate reclamation             | 1     | 0.043478261 | 0.031809201 |
| GO:0050878 | regulation of body fluid levels                     | 5     | 0.01002004  | 0.001783292 |
| GO:0048146 | positive regulation of fibroblast proliferation     | 2     | 0.037735849 | 0.004040813 |
| GO:0010001 | glial cell differentiation                          | 3     | 0.015228426 | 0.005161122 |
| GO:0050891 | multicellular organismal water homeostasis          | 2     | 0.03125     | 0.005839829 |
| GO:0009247 | glycolipid biosynthetic process                     | 2     | 0.029411765 | 0.006569524 |
| GO:0030104 | water homeostasis                                   | 2     | 0.029411765 | 0.006569524 |
| GO:0006643 | membrane lipid metabolic process                    | 3     | 0.013513514 | 0.00717923  |
| GO:0050805 | negative regulation of synaptic transmission        | 2     | 0.02739726  | 0.007536937 |
| GO:0051702 | interaction with symbiont                           | 2     | 0.027027027 | 0.007737704 |
| GO:2000027 | regulation of organ morphogenesis                   | 3     | 0.012048193 | 0.009820878 |
| GO:0048145 | regulation of fibroblast proliferation              | 2     | 0.022988506 | 0.010563645 |
| GO:1902476 | chloride transmembrane transport                    | 2     | 0.022988506 | 0.010563645 |
| GO:0048144 | fibroblast proliferation                            | 2     | 0.022727273 | 0.010797339 |
| GO:0042063 | gliogenesis                                         | 3     | 0.011538462 | 0.011039578 |
| GO:0021782 | glial cell development                              | 2     | 0.021276596 | 0.012247256 |
| GO:0052652 | cyclic purine nucleotide metabolic process          | 2     | 0.019230769 | 0.014841957 |
| GO:0009152 | purine ribonucleotide biosynthetic process          | 3     | 0.010273973 | 0.015067585 |
| GO:0009190 | cyclic nucleotide biosynthetic process              | 2     | 0.019047619 | 0.015113421 |
| GO:0098661 | inorganic anion transmembrane transport             | 2     | 0.018867925 | 0.015387033 |
| GO:0006164 | purine nucleotide biosynthetic process              | 3     | 0.010135135 | 0.01562235  |
| GO:0006821 | chloride transport                                  | 2     | 0.018691589 | 0.015662786 |
| GO:0060071 | Wnt signaling pathway, planar cell polarity pathway | 2     | 0.018181818 | 0.016502804 |
| GO:0009260 | ribonucleotide biosynthetic process                 | 3     | 0.009836066 | 0.016912688 |
| GO:0090175 | regulation of establishment of planar polarity      | 2     | 0.017857143 | 0.017073371 |
| GO:0072522 | purine-containing compound biosynthetic process     | 3     | 0.00974026  | 0.0173558   |
| GO:0046390 | ribose phosphate biosynthetic process               | 3     | 0.009708738 | 0.017504952 |
| GO:0019755 | one-carbon compound transport                       | 1     | 0.1         | 0.017769668 |



|            |                                                                                         |   |             |             |
|------------|-----------------------------------------------------------------------------------------|---|-------------|-------------|
| GO:0021670 | lateral ventricle development                                                           | 1 | 0.1         | 0.017769668 |
| GO:0032429 | regulation of phospholipase A2 activity                                                 | 1 | 0.1         | 0.017769668 |
| GO:0033131 | regulation of glucokinase activity                                                      | 1 | 0.1         | 0.017769668 |
| GO:0060502 | epithelial cell proliferation involved in lung morphogenesis                            | 1 | 0.1         | 0.017769668 |
| GO:0061140 | lung secretory cell differentiation                                                     | 1 | 0.1         | 0.017769668 |
| GO:0106070 | regulation of adenylate cyclase-activating G-protein coupled receptor signaling pathway | 1 | 0.1         | 0.017769668 |
| GO:0015791 | polyol transport                                                                        | 1 | 0.090909091 | 0.019529734 |
| GO:0046689 | response to mercury ion                                                                 | 1 | 0.090909091 | 0.019529734 |
| GO:0071474 | cellular hyperosmotic response                                                          | 1 | 0.090909091 | 0.019529734 |
| GO:1902894 | negative regulation of pri-miRNA transcription by RNA polymerase II                     | 1 | 0.090909091 | 0.019529734 |
| GO:1903299 | regulation of hexokinase activity                                                       | 1 | 0.090909091 | 0.019529734 |
| GO:0001736 | establishment of planar polarity                                                        | 2 | 0.016393443 | 0.020050493 |
| GO:0007164 | establishment of tissue polarity                                                        | 2 | 0.016393443 | 0.020050493 |
| GO:0060456 | positive regulation of digestive system process                                         | 1 | 0.083333333 | 0.021286748 |
| GO:1900452 | regulation of long term synaptic depression                                             | 1 | 0.083333333 | 0.021286748 |
| GO:0006664 | glycolipid metabolic process                                                            | 2 | 0.015748031 | 0.021615076 |
| GO:1903509 | liposaccharide metabolic process                                                        | 2 | 0.015748031 | 0.021615076 |
| GO:0007596 | blood coagulation                                                                       | 3 | 0.008797654 | 0.02266181  |
| GO:0030157 | pancreatic juice secretion                                                              | 1 | 0.076923077 | 0.023040714 |
| GO:0046415 | urate metabolic process                                                                 | 1 | 0.076923077 | 0.023040714 |
| GO:0046541 | saliva secretion                                                                        | 1 | 0.076923077 | 0.023040714 |
| GO:0050746 | regulation of lipoprotein metabolic process                                             | 1 | 0.076923077 | 0.023040714 |
| GO:0061029 | eyelid development in camera-type eye                                                   | 1 | 0.076923077 | 0.023040714 |
| GO:0090179 | planar cell polarity pathway involved in neural tube closure                            | 1 | 0.076923077 | 0.023040714 |
| GO:0090335 | regulation of brown fat cell differentiation                                            | 1 | 0.076923077 | 0.023040714 |
| GO:1900004 | negative regulation of serine-type endopeptidase activity                               | 1 | 0.076923077 | 0.023040714 |
| GO:1902572 | negative regulation of serine-type peptidase activity                                   | 1 | 0.076923077 | 0.023040714 |
| GO:0007599 | hemostasis                                                                              | 3 | 0.00867052  | 0.023535082 |
| GO:0007586 | digestion                                                                               | 2 | 0.015037594 | 0.023557703 |
| GO:0050817 | coagulation                                                                             | 3 | 0.008645533 | 0.02371193  |
| GO:0030950 | establishment or maintenance of actin cytoskeleton                                      | 1 | 0.071428571 | 0.024791638 |

|            |                                                                                |   |             |             |
|------------|--------------------------------------------------------------------------------|---|-------------|-------------|
|            | polarity                                                                       |   |             |             |
| GO:0042447 | hormone catabolic process                                                      | 1 | 0.071428571 | 0.024791638 |
| GO:0072488 | ammonium transmembrane transport                                               | 1 | 0.071428571 | 0.024791638 |
| GO:0090178 | regulation of establishment of planar polarity involved in neural tube closure | 1 | 0.071428571 | 0.024791638 |
| GO:0001738 | morphogenesis of a polarized epithelium                                        | 2 | 0.01459854  | 0.024891501 |
| GO:0090177 | establishment of planar polarity involved in neural tube closure               | 1 | 0.066666667 | 0.026539526 |
| GO:1900003 | regulation of serine-type endopeptidase activity                               | 1 | 0.066666667 | 0.026539526 |
| GO:1902571 | regulation of serine-type peptidase activity                                   | 1 | 0.066666667 | 0.026539526 |
| GO:0035148 | tube formation                                                                 | 2 | 0.013888889 | 0.027298545 |
| GO:0030900 | forebrain development                                                          | 3 | 0.008174387 | 0.02740255  |
| GO:0046467 | membrane lipid biosynthetic process                                            | 2 | 0.013793103 | 0.027649865 |
| GO:0009165 | nucleotide biosynthetic process                                                | 3 | 0.008130081 | 0.027787703 |
| GO:0060192 | negative regulation of lipase activity                                         | 1 | 0.0625      | 0.028284381 |
| GO:0071732 | cellular response to nitric oxide                                              | 1 | 0.0625      | 0.028284381 |
| GO:1901293 | nucleoside phosphate biosynthetic process                                      | 3 | 0.008042895 | 0.028566778 |
| GO:0009187 | cyclic nucleotide metabolic process                                            | 2 | 0.013333333 | 0.029433947 |
| GO:0002076 | osteoblast development                                                         | 1 | 0.058823529 | 0.03002621  |
| GO:0042249 | establishment of planar polarity of embryonic epithelium                       | 1 | 0.058823529 | 0.03002621  |
| GO:0043951 | negative regulation of cAMP-mediated signaling                                 | 1 | 0.058823529 | 0.03002621  |
| GO:0051262 | protein tetramerization                                                        | 2 | 0.013071895 | 0.030526126 |
| GO:0035567 | non-canonical Wnt signaling pathway                                            | 2 | 0.012987013 | 0.030893764 |
| GO:1900371 | regulation of purine nucleotide biosynthetic process                           | 2 | 0.012987013 | 0.030893764 |
| GO:0030808 | regulation of nucleotide biosynthetic process                                  | 2 | 0.012903226 | 0.031263179 |
| GO:0030952 | establishment or maintenance of cytoskeleton polarity                          | 1 | 0.055555556 | 0.031765017 |
| GO:0070633 | transepithelial transport                                                      | 1 | 0.055555556 | 0.031765017 |
| GO:1905276 | regulation of epithelial tube formation                                        | 1 | 0.055555556 | 0.031765017 |
| GO:0006497 | protein lipidation                                                             | 2 | 0.012578616 | 0.032758473 |
| GO:0007517 | muscle organ development                                                       | 3 | 0.007575758 | 0.033272882 |
| GO:0006833 | water transport                                                                | 1 | 0.052631579 | 0.033500807 |
| GO:0015669 | gas transport                                                                  | 1 | 0.052631579 | 0.033500807 |
| GO:0033622 | integrin activation                                                            | 1 | 0.052631579 | 0.033500807 |

|            |                                                       |   |             |             |
|------------|-------------------------------------------------------|---|-------------|-------------|
| GO:0071731 | response to nitric oxide                              | 1 | 0.052631579 | 0.033500807 |
| GO:1902170 | cellular response to reactive nitrogen species        | 1 | 0.052631579 | 0.033500807 |
| GO:0008361 | regulation of cell size                               | 2 | 0.012195122 | 0.034666733 |
| GO:0042158 | lipoprotein biosynthetic process                      | 2 | 0.012195122 | 0.034666733 |
| GO:0006665 | sphingolipid metabolic process                        | 2 | 0.012121212 | 0.035053535 |
| GO:0014850 | response to muscle activity                           | 1 | 0.047619048 | 0.036963358 |
| GO:0061436 | establishment of skin barrier                         | 1 | 0.047619048 | 0.036963358 |
| GO:0097503 | sialylation                                           | 1 | 0.047619048 | 0.036963358 |
| GO:1901685 | glutathione derivative metabolic process              | 1 | 0.047619048 | 0.036963358 |
| GO:1901687 | glutathione derivative biosynthetic process           | 1 | 0.047619048 | 0.036963358 |
| GO:0006972 | hyperosmotic response                                 | 1 | 0.045454545 | 0.038690128 |
| GO:0007398 | ectoderm development                                  | 1 | 0.045454545 | 0.038690128 |
| GO:0009651 | response to salt stress                               | 1 | 0.045454545 | 0.038690128 |
| GO:0042135 | neurotransmitter catabolic process                    | 1 | 0.045454545 | 0.038690128 |
| GO:0060487 | lung epithelial cell differentiation                  | 1 | 0.045454545 | 0.038690128 |
| GO:0001919 | regulation of receptor recycling                      | 1 | 0.043478261 | 0.040413902 |
| GO:0006884 | cell volume homeostasis                               | 1 | 0.043478261 | 0.040413902 |
| GO:0021952 | central nervous system projection neuron axonogenesis | 1 | 0.043478261 | 0.040413902 |
| GO:0033561 | regulation of water loss via skin                     | 1 | 0.043478261 | 0.040413902 |
| GO:0060479 | lung cell differentiation                             | 1 | 0.043478261 | 0.040413902 |
| GO:0015698 | inorganic anion transport                             | 2 | 0.011111111 | 0.041055765 |
| GO:1905330 | regulation of morphogenesis of an epithelium          | 2 | 0.011049724 | 0.041468954 |
| GO:0006688 | glycosphingolipid biosynthetic process                | 1 | 0.041666667 | 0.042134685 |
| GO:0021591 | ventricular system development                        | 1 | 0.041666667 | 0.042134685 |
| GO:0032800 | receptor biosynthetic process                         | 1 | 0.041666667 | 0.042134685 |
| GO:0071280 | cellular response to copper ion                       | 1 | 0.041666667 | 0.042134685 |
| GO:0090103 | cochlea morphogenesis                                 | 1 | 0.041666667 | 0.042134685 |
| GO:0048839 | inner ear development                                 | 2 | 0.010928962 | 0.042300101 |
| GO:0051216 | cartilage development                                 | 2 | 0.010928962 | 0.042300101 |
| GO:0052547 | regulation of peptidase activity                      | 3 | 0.006802721 | 0.043586269 |
| GO:0022011 | myelination in peripheral nervous system              | 1 | 0.038461538 | 0.045567296 |
| GO:0032292 | peripheral nervous system axon ensheathment           | 1 | 0.038461538 | 0.045567296 |
| GO:0042044 | fluid transport                                       | 1 | 0.038461538 | 0.045567296 |
| GO:0051346 | negative regulation of hydrolase activity             | 3 | 0.00660793  | 0.046834206 |
| GO:0006929 | substrate-dependent cell migration                    | 1 | 0.037037037 | 0.047279134 |
| GO:1900542 | regulation of purine nucleotide metabolic process     | 2 | 0.01025641  | 0.047417774 |

|            |                                                                           |   |             |             |
|------------|---------------------------------------------------------------------------|---|-------------|-------------|
| GO:0042157 | lipoprotein metabolic process                                             | 2 | 0.01010101  | 0.0487314   |
| GO:0031365 | N-terminal protein amino acid modification                                | 1 | 0.035714286 | 0.048988001 |
| GO:0060292 | long term synaptic depression                                             | 1 | 0.035714286 | 0.048988001 |
| GO:0007188 | adenylate cyclase-modulating G-protein coupled receptor signaling pathway | 2 | 0.01        | 0.04961457  |
